# Supplementary material for: Application of new N- and S-doped amorphous carbon in D-μSPE and its combination with deep eutectic solvent-based DLLME for the extraction of some mycotoxins from soymilk
Source: Royal Society of Chemistry journal article supplement (doi:10.1039/d1ay01057c), 2021-01-01
Supplement: d1ay01057c1.pdf [file d1ay01057c1.pdf]

### Supplementary data

#### **Application of new N and S doped amorphous carbon in D- $\mu$ SPE and its combination with deep eutectic solvent-based DLLME for the extraction of some mycotoxins from soymilk**

Anahid Rezaeefar<sup>1,2</sup>, Mir Ali Farajzadeh<sup>3,4</sup>, Mahbbob Nemati<sup>5</sup>, Mohammad Reza Afshar Mogaddam<sup>5, 6,\*</sup>  
Farzaneh Lotfipour<sup>4,\*</sup>

<sup>1</sup> *Student Research Committee, Tabriz University of Medical Sciences, Tabriz, Iran*

<sup>2</sup> *Department of Pharmaceutics and Food, Faculty of Pharmacy, Tabriz University of Medical Sciences, Tabriz, Iran*

<sup>3</sup> *Department of Analytical Chemistry, Faculty of Chemistry, University of Tabriz, Tabriz, Iran*

<sup>4</sup> *Engineering Faculty, Near East University, 99138 Nicosia, North Cyprus, Mersin 10, Turkey*

<sup>5</sup> *Food and Drug Safety Research Center, Tabriz University of Medical Sciences, Tabriz, Iran*

<sup>6</sup> *Pharmaceutical Analysis Research Center, Tabriz University of Medical Sciences, Tabriz, Iran*

First corresponding author: Dr. M.R. Afshar Mogaddam

Tel.: +98 4133372450

Fax: 98 4133344798

Email: mr.afsharmogaddam@yahoo.com; afsharmogaddam@tbzmed.ac.ir

Second corresponding author: Professor F. Lotfipour

Tel.: +98 4133372450

Fax: 98 4133344798

Email: farzaneh.lotfipour@gmail.com

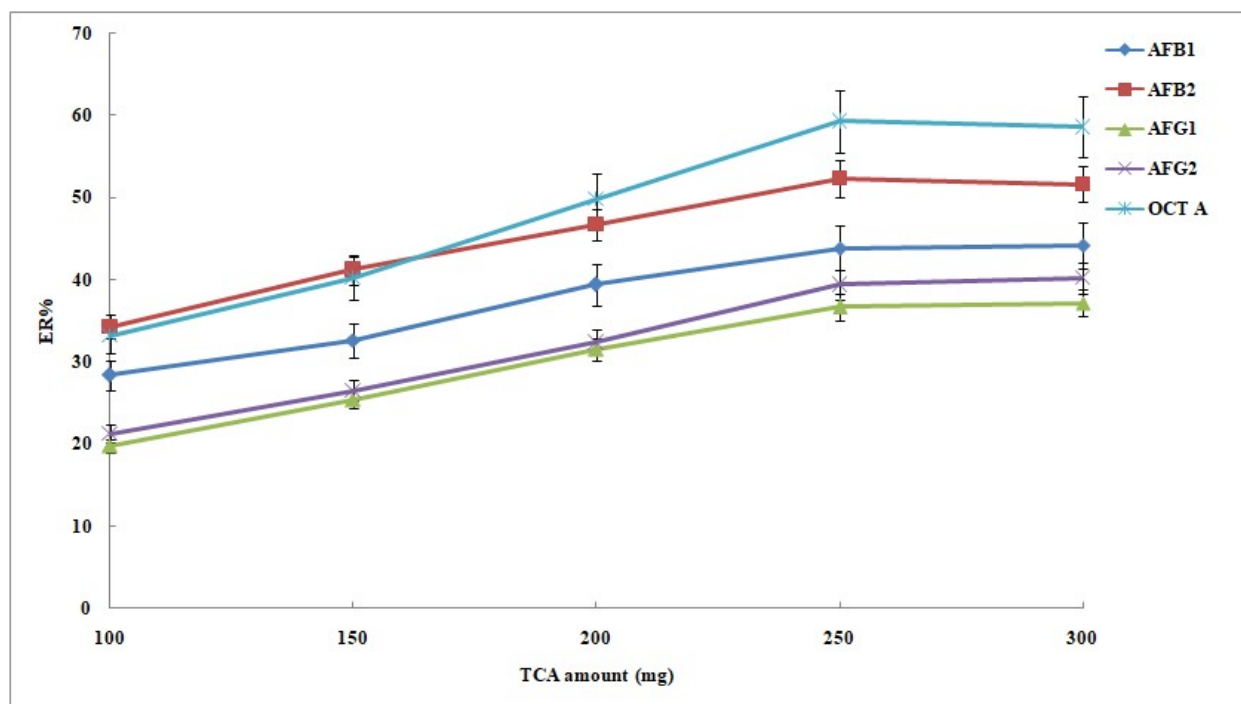

Fig. S1. Optimization TCA amount.

Extraction conditions: sample, 10 mL blank soymilk spiked with the analytes at a concentration of 15 ng/L (each analyte); sorbent amount, 250 mg; vortexing time, 2 min; elution solvent type (volume), ACN

(1.0 mL), desorption time, 2 min; extraction solvent type (volume) used in DLLME; ChCl: *p*-chlorophenol: alpha-terpineol DES (100  $\mu$ L); and centrifugation time (speed), 5 min (4000 rpm). The

error bars indicate minimum and maximum values of three determinations.

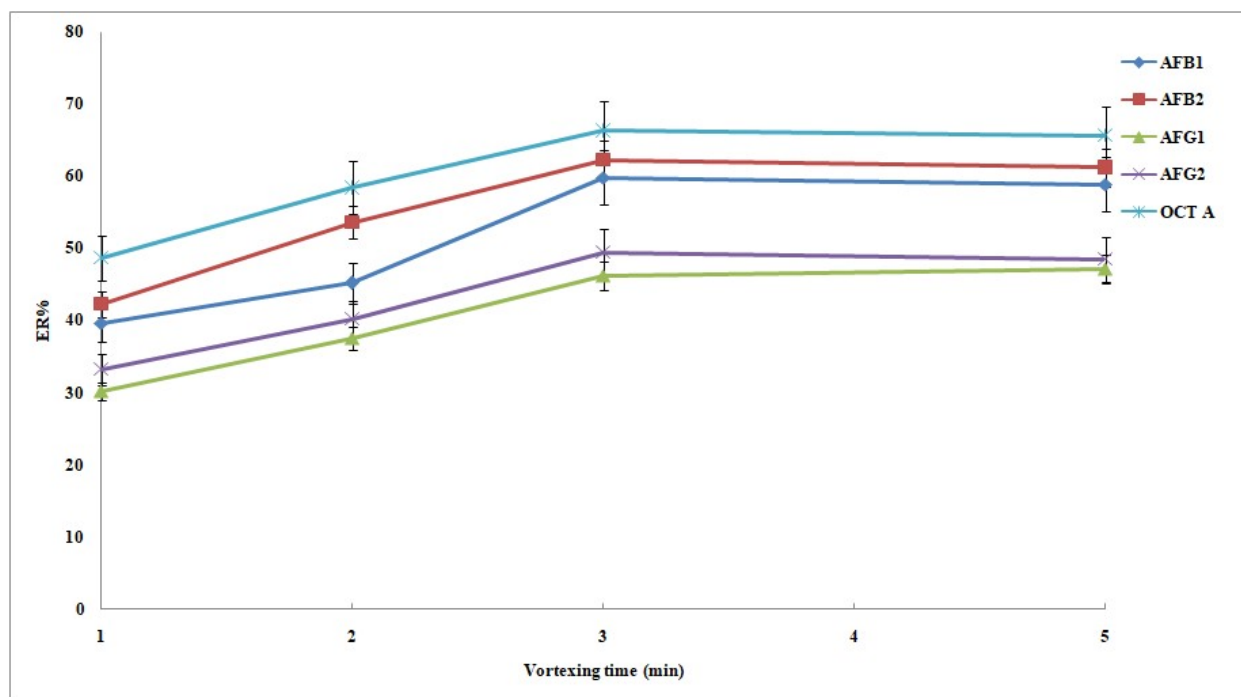

Fig. S2. Optimization of vortexing time.

Extraction conditions: are the same as those used in Fig. S1, except 3 min were selected for vortexing time.

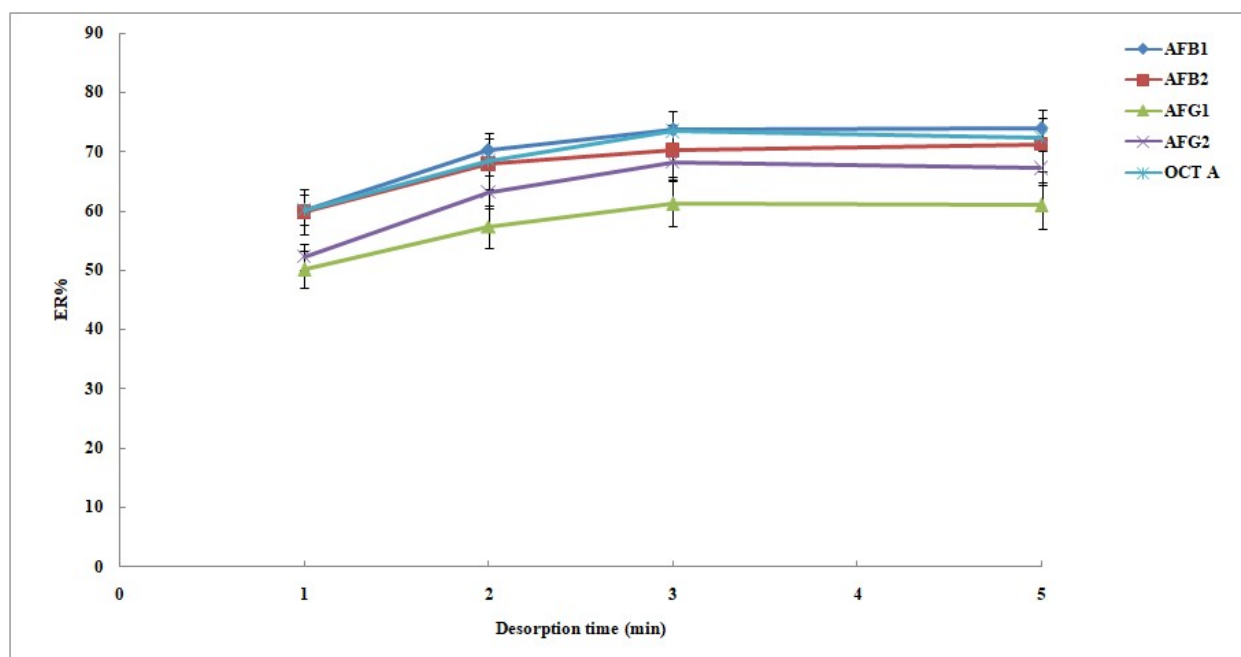

Fig. S3. Optimization of desorption time.

Extraction conditions: are the same as those used in Fig. S2 except 150 mg and 3 min were selected for the sorbent amount and vortexing time, respectively.

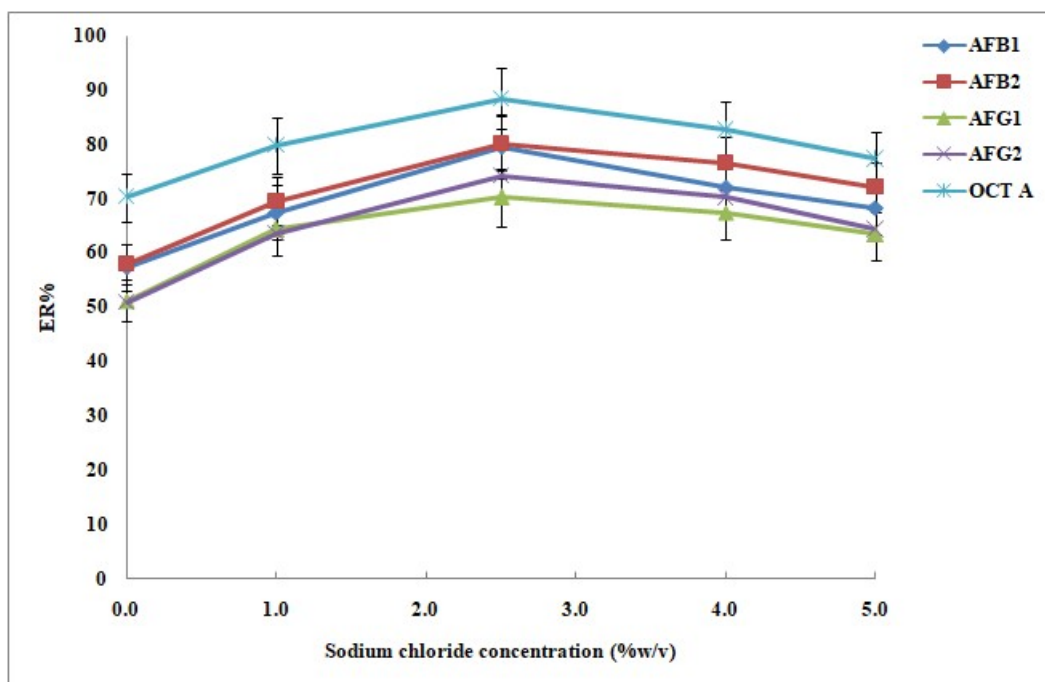

Fig. S4. Salt addition effect.

Extraction conditions: are the same as those used in Fig. S2, except 3 min was selected as the desorption time.
